# Supplementary material for: Functional Validation of cas9/GuideRNA Constructs for Site-Directed Mutagenesis of Triticale ABA8′OH1 loci
Source: MDPI journal article supplement (doi:10.3390/ijms22137038), 2021-06-29
Supplement: s1 [file s1]

**Table S1.** Primers used for PCR amplifications and sequencing. Mismatches are indicated in red. Underlined are the sequences used for NGS library construction.

| Name      | Sequence (5'-3')                                               | Application                                                                                                                                                                   |
|-----------|----------------------------------------------------------------|-------------------------------------------------------------------------------------------------------------------------------------------------------------------------------|
| ABA_uF    | TACTCCTCCAAGAACCCCAAC                                          | Pair of common primers used for amplification of TsABA8'OH sequences prior to cloning and Sanger sequencing                                                                   |
| ABA_uR    | AAGGTGAAGGAGAGGATGGA                                           |                                                                                                                                                                               |
| ABA2_ngsF | <u>TCGTCGGCAGCGTCAGATGTGTATAAGAGACAGA</u> AAGAACCCCAACGTCTTCTT | Pair of common primers used for amplification of sequences targeted by gRNA-ABA/1/364 prior to deep sequencing. Library construction adapters were underlined.                |
| ABA2_ngsR | <u>GTCTCGTGGGCTCGGAGATGTGTATAAGAGACAGGCACTCACAGTCTTCATCTC</u>  |                                                                                                                                                                               |
| ABA3_ngsF | <u>TCGTCGGCAGCGTCAGATGTGTATAAGAGACAGATTGTGGCCACATCATCTC</u>    | Pair of common primers used for amplification of sequences targeted by gRNA-ABA/2/323 prior to deep sequencing. Library construction adapters were underlined.                |
| ABA3_ngsR | <u>GTCTCGTGGGCTCGGAGATGTGTATAAGAGACAGCCTTCTCCCTCGCGATCTC</u>   |                                                                                                                                                                               |
| RABex1F   | GGCCCATCTTCAAGACGCA                                            | Common forward primer used in pairs with one of three genome specific primers in T7EI assay.                                                                                  |
| Aex3R     | GGCGTGCTCTTCCTGTTGATTG <b>A</b> AT                             | Genome A-specific primer used for PCR amplification in T7EI assay. Notice additional mismatch introduced to improve its specificity in third position to 3' end (marked red). |
| Bex3R     | GGCATGCTCTTCCTGTTAATTG <b>A</b> TG                             | Genome B-specific primer used for PCR amplification in T7EI assay. Notice additional mismatch introduced to improve its specificity in third position to 3' end (marked red). |
| Rex3R     | AGCGTGCTCTTCCTGTTATTTG <b>A</b> TC                             | Genome R-specific primer used for PCR amplification in T7EI assay. Notice additional mismatch introduced to improve its specificity in third position to 3' end (marked red). |
