# Supplementary material for: Functional Validation of cas9/GuideRNA Constructs for Site-Directed Mutagenesis of Triticale ABA8′OH1 loci
Source: MDPI journal article supplement (doi:10.3390/ijms22137038), 2021-06-29
Supplement: s1 [file s1]

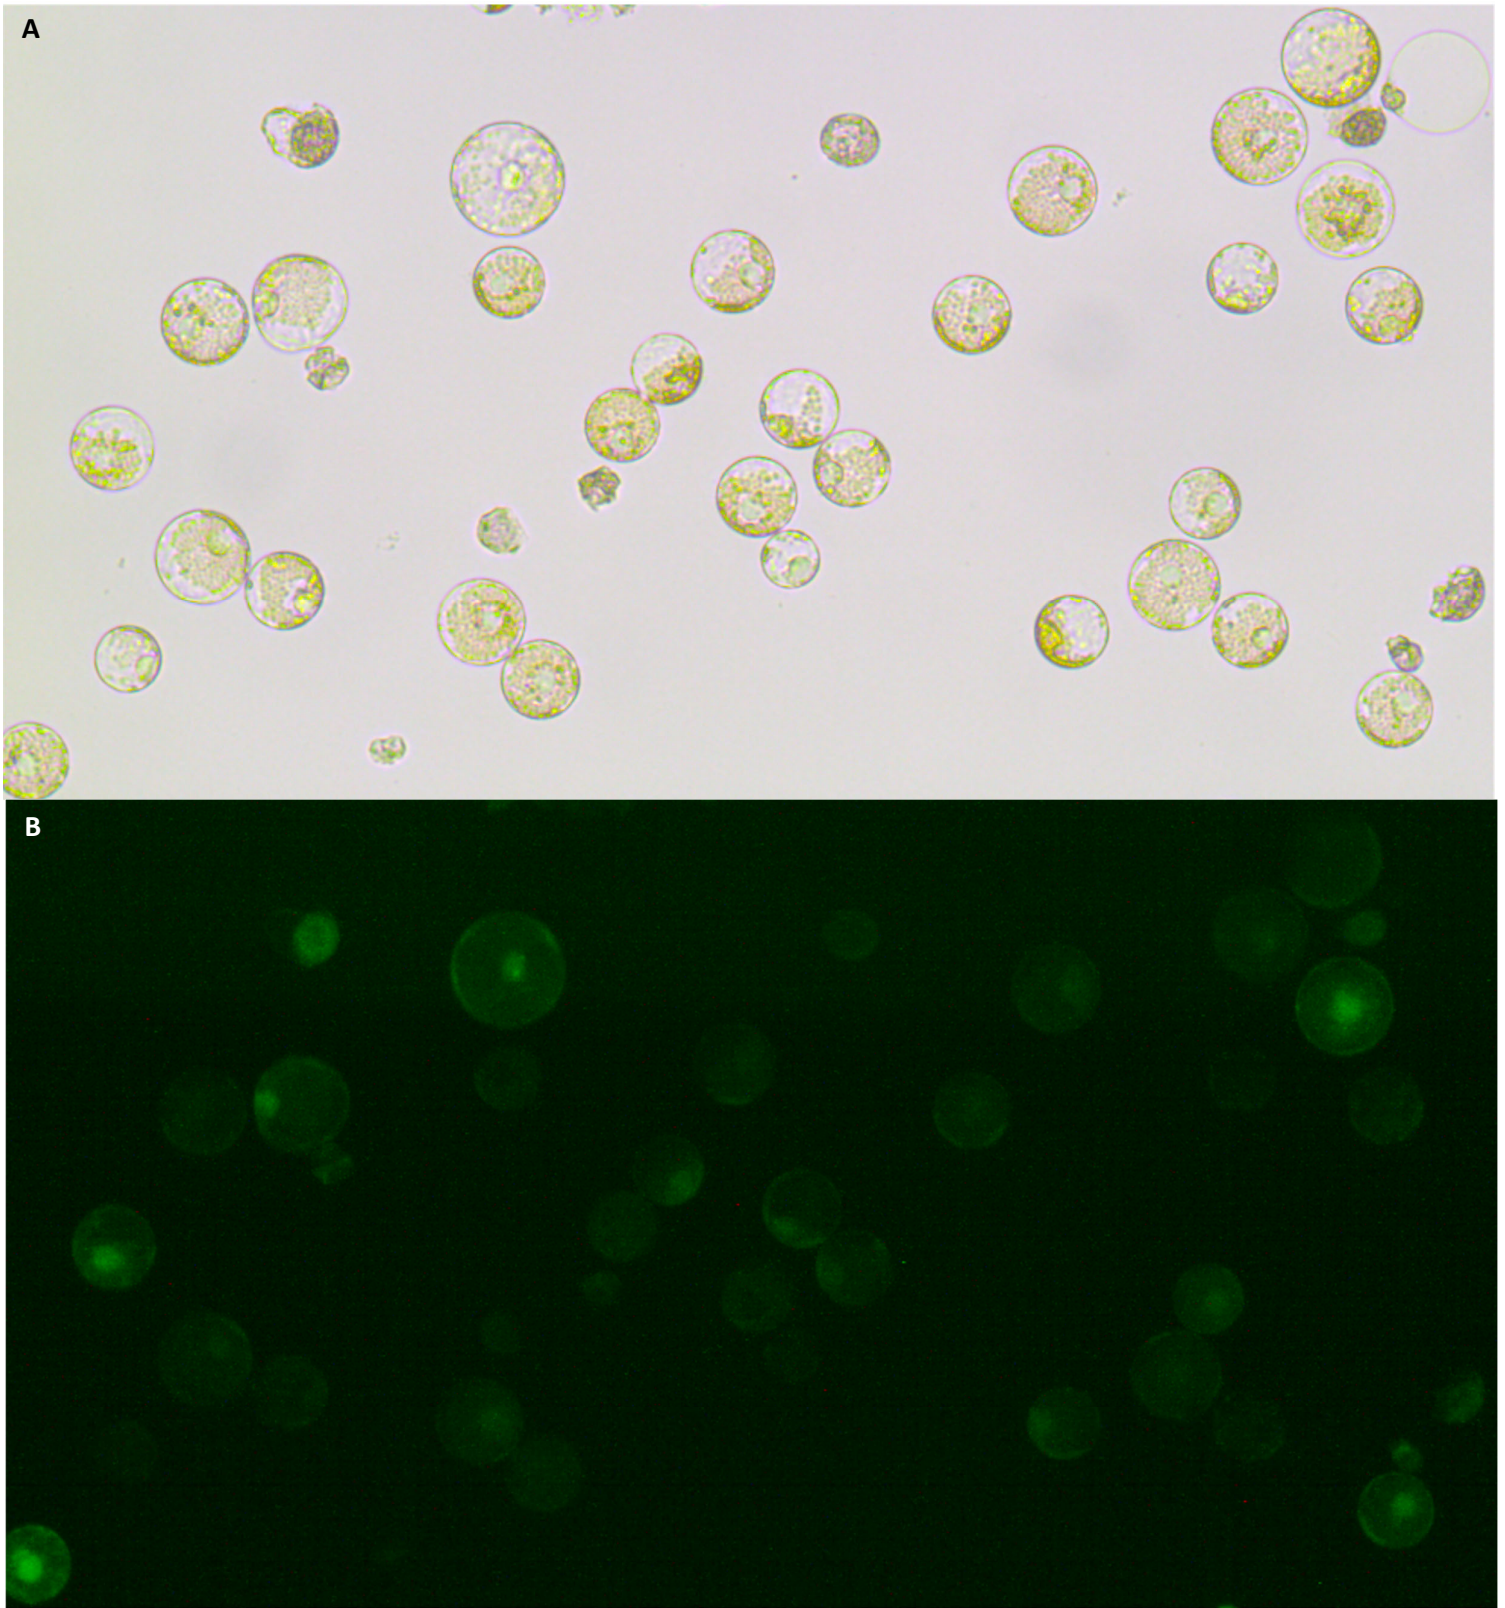

**Figure S2:** Population of triticales mesophyll protoplasts 48h after transfection with CRISPR/Cas9 coding plasmid. Brightfield (A) and fluorescence (B) observations of green fluorescence protein (GFP) were used to estimate transfection efficiency. Magnification: 200x.
