# Supplementary material for: Functional Validation of cas9/GuideRNA Constructs for Site-Directed Mutagenesis of Triticale ABA8′OH1 loci
Source: MDPI journal article supplement (doi:10.3390/ijms22137038), 2021-06-29
Supplement: s1 [file s1]

**Table S2:** Mutation frequencies in Triticale protoplasts acquired by deep-sequencing of short reads. Type and size of mutation generated by individual constructs was quantified as a percentage of the total construct efficiency.

|                             |                       | gRNA-ABA/1/364 |       |       | gRNA-ABA/1/364+<br>TREX2 |       |       | gRNA-ABA/2/323 |       |       | gRNA-ABA/2/323+<br>TREX2 |       |       |
|-----------------------------|-----------------------|----------------|-------|-------|--------------------------|-------|-------|----------------|-------|-------|--------------------------|-------|-------|
|                             |                       | genome         |       |       | genome                   |       |       | genome         |       |       | genome                   |       |       |
|                             |                       | A              | B     | R     | A                        | B     | R     | A              | B     | R     | A                        | B     | R     |
| Mutation type frequency [%] | del                   | 0.37           | 0.25  | 0.59  | 0.09                     | 0.04  | 0.00  | 36.23          | 39.06 | 41.78 | 0.89                     | 0.15  | 0.04  |
|                             | 1 bp ins              | 0.03           | 0.04  | 0.07  | 0.00                     | 0.02  | 0.00  | 19.29          | 26.31 | 21.60 | 0.00                     | 0.00  | 0.00  |
|                             | sub                   | 3.01           | 0.17  | 1.23  | 0.01                     | 0.15  | 0.00  | 2.67           | 1.23  | 0.38  | 0.09                     | 0.30  | 0.00  |
|                             | del                   | 28.92          | 30.46 | 28.07 | 14.04                    | 12.00 | 11.24 | 32.65          | 28.70 | 35.48 | 14.42                    | 15.19 | 12.31 |
|                             | 2-10 bp ins           | 0.00           | 0.00  | 0.00  | 0.02                     | 0.00  | 0.00  | 0.00           | 0.23  | 0.00  | 0.00                     | 0.00  | 0.00  |
|                             | sub                   | 0.08           | 0.17  | 0.62  | 0.01                     | 0.00  | 0.00  | 0.00           | 0.00  | 0.00  | 0.05                     | 0.00  | 0.00  |
|                             | del                   | 66.08          | 66.30 | 68.06 | 83.88                    | 85.01 | 86.37 | 2.82           | 2.46  | 0.66  | 82.60                    | 83.64 | 84.09 |
|                             | 11-99 bp ins          | 0.55           | 0.66  | 0.13  | 0.02                     | 0.06  | 0.00  | 6.34           | 2.01  | 0.09  | 0.00                     | 0.00  | 0.00  |
|                             | sub                   | 0.06           | 0.92  | 0.00  | 0.01                     | 1.80  | 0.15  | 0.00           | 0.00  | 0.00  | 0.00                     | 0.00  | 0.00  |
|                             | del                   | 0.28           | 0.04  | 0.57  | 1.39                     | 0.89  | 2.03  | 0.00           | 0.00  | 0.00  | 1.60                     | 0.41  | 3.49  |
|                             | >100 bp ins           | 0.07           | 0.00  | 0.04  | 0.01                     | 0.00  | 0.01  | 0.00           | 0.00  | 0.00  | 0.00                     | 0.00  | 0.00  |
|                             | sub                   | 0.00           | 0.00  | 0.00  | 0.00                     | 0.00  | 0.00  | 0.00           | 0.00  | 0.00  | 0.00                     | 0.00  | 0.00  |
|                             | Complex modifications | 0.54           | 0.99  | 0.62  | 0.43                     | 0.04  | 0.19  | 0.00           | 0.00  | 0.00  | 0.34                     | 0.32  | 0.07  |
